# Supplementary material
Source: HighWire-hosted journal article supplement (https://bmjopen.bmj.com/content/6/7/e010919)
Supplement: inline-supplementary-material-1 [file inline-supplementary-material-1.pdf]

# **Appendix**

## **Search strategy - List of research registers**

We will search the following research registers:

- European Clinical Trials Database (EudraCT)
- UMIN Clinical Trials Registry (UMIN-CTR)
- JapicCTI ([http://www.clinicaltrials.jp/user/cteSearch\\_e.jsp](http://www.clinicaltrials.jp/user/cteSearch_e.jsp))
- Japan Medical Association Centre for Clinical Trials (JMACCT)
- UK National Research Register [for archived content only]
- WHO International Clinical Trials Registry Platform (WHO ICTRP) [includes datasets from the following providers]:
  - Australian New Zealand Clinical Trials Registry (ANZCTR)
  - Brazilian Clinical Trials Registry (ReBec)
  - Chinese Clinical Trial Registry (ChiCTR)
  - Clinical Research Information Service - Republic of Korea (CRIS)
  - Clinical Trials Registry - India (CTRI)
  - ClinicalTrials.gov
  - Cuban Public Registry of Clinical Trials (RPCEC)
  - EU Clinical Trials Register (EU-CTR)
  - German Clinical Trials Register (GermanCTR)
  - ISRCTN
  - Iranian Registry of Clinical Trials (IRCT)
  - Japan Primary Registries Network (JPRN)
  - Netherlands National Trial Register (NTR)
  - Pan African Clinical Trial Registry (PACTR)
  - Sri Lanka Clinical Trials Registry (SLCTR)
  - Thai Clinical Trials Register (TCTR)

For extra sensitivity we will undertake our own searches in some of the key registers that provide datasets for inclusion in WHO ICTRP. The list of registers is as follows:

- Australian Clinical Trials Registry (ANZCTR)
- clinicaltrials.gov
- ISRCTN
- Netherlands National Trial Register (NTR)
